# Supplementary material for: Determinants of Burnout among Teachers: A Systematic Review of Longitudinal Studies
Source: MDPI journal article supplement (doi:10.3390/ijerph19095776), 2022-05-09
Supplement: s1 [file s1]

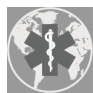

**Supplementary Table S1. Standardized regression coefficients and standard errors for the burnout determinants included in the category *support***

| article        | support            | wave | school      | beta   | se    |
|----------------|--------------------|------|-------------|--------|-------|
| Beausert_2016  | colleague          |      | 1 primary   | 0.003  | 0.035 |
| Beausert_2016  | supervisor         |      | 1 primary   | 0.023  | 0.027 |
| Beausert_2016  | community          |      | 1 primary   | 0.066  | 0.028 |
| Beausert_2016  | colleague          |      | 2 primary   | -0.051 | 0.023 |
| Beausert_2016  | supervisor         |      | 2 primary   | 0.023  | 0.021 |
| Beausert_2016  | community          |      | 2 primary   | 0.076  | 0.023 |
| Beausert_2016  | colleague          |      | 3 primary   | 0.034  | 0.023 |
| Beausert_2016  | supervisor         |      | 3 primary   | -0.029 | 0.022 |
| Beausert_2016  | community          |      | 3 primary   | 0.059  | 0.025 |
| Beausert_2016  | colleague          |      | 1 secondary | -0.011 | 0.056 |
| Beausert_2016  | supervisor         |      | 1 secondary | 0.018  | 0.044 |
| Beausert_2016  | community          |      | 1 secondary | 0.06   | 0.047 |
| Beausert_2016  | colleague          |      | 2 secondary | -0.133 | 0.042 |
| Beausert_2016  | supervisor         |      | 2 secondary | -0.021 | 0.036 |
| Beausert_2016  | community          |      | 2 secondary | 0.12   | 0.043 |
| Beausert_2016  | colleague          |      | 3 secondary | -0.027 | 0.046 |
| Beausert_2016  | supervisor         |      | 3 secondary | -0.009 | 0.042 |
| Beausert_2016  | community          |      | 3 secondary | -0.039 | 0.051 |
| Feuerhahn_2013 | emotional          | NA   | NA          | -0.21  | 0.14  |
| Salanova_2005  | social facilitator | NA   | NA          | 0.03   | 0.05  |

**Supplementary Table S2. Standardized regression coefficients and standard errors for the burnout determinants included in the category *conflict***

| article        | type                     | beta  | se   |
|----------------|--------------------------|-------|------|
| Feuerhahn_2013 | parents criticism        | 0.24  | 0.16 |
| Feuerhahn_2013 | conflict with colleagues | 0.01  | 0.13 |
| Salanova_2005  | parents_students         | -0.01 | 0.04 |

**Supplementary Table S3. Standardized regression coefficients and standard errors for the burnout determinants included in the category *individual characteristics***

| article        | type                  | beta  | se     |
|----------------|-----------------------|-------|--------|
| Feuerhahn_2013 | emotional_dissonance  | 0.02  | 0.17   |
| Feuerhahn_2013 | teacher_self_efficacy | 0.68  | 0.24   |
| Malinen_2016   | teacher_self_efficacy | -0.36 | -0.109 |
| Malinen_2016   | job_satisfaction      | -0.28 | -0.085 |
| Salanova_2005  | exhaustion_t1         | 0.81  | 0.04   |
| Goddard_2006   | neuroticism           | 0.19  | 0.061  |

**Supplementary Table S4. Standardized regression coefficients and standard errors for the burnout determinants included in the category *organizational context***

| article               | type                            | beta  | se   |
|-----------------------|---------------------------------|-------|------|
| Feuerhahn_2013        | time_pressure                   | -0.03 | 0.13 |
| Feuerhahn_2013        | classroom_disruption            | 0.38  | 0.18 |
| Gonzales-Morales_2012 | perceived_collective_exhaustion | 0.33  | 0.15 |
| Gonzales-Morales_2012 | workload_stressors              | 0.09  | 0.07 |
| Salanova_2005         | technical_obstacles             | 0.01  | 0.04 |
| Salanova_2005         | effective_class_management      | -0.07 | 0.07 |
| Goddard_2006          | work_climate                    | 0.29  | 0.09 |
