# Supplementary material for: Determinants of Burnout among Teachers: A Systematic Review of Longitudinal Studies
Source: MDPI journal article supplement (doi:10.3390/ijerph19095776), 2022-05-09
Supplement: s1 [file s1]

| <input type="checkbox"/> | # ▲ | Searches                                                                                                                                                                                                                                                                                                                                                                                                                                                                                                                                                                                                                                       | Results |
|--------------------------|-----|------------------------------------------------------------------------------------------------------------------------------------------------------------------------------------------------------------------------------------------------------------------------------------------------------------------------------------------------------------------------------------------------------------------------------------------------------------------------------------------------------------------------------------------------------------------------------------------------------------------------------------------------|---------|
| <input type="checkbox"/> | 1   | ▶ (Burnout or burn-out).mp.                                                                                                                                                                                                                                                                                                                                                                                                                                                                                                                                                                                                                    | 25667   |
| <input type="checkbox"/> | 2   | ▶ limit 1 to human                                                                                                                                                                                                                                                                                                                                                                                                                                                                                                                                                                                                                             | 23479   |
| <input type="checkbox"/> | 3   | ▶ (occupation* or job* or employment or work-related or working or "at work" or workplace* or work-place* or "work place" or worke* or workload or "work site*" or worksite* or industry or organizational characteristics).mp.                                                                                                                                                                                                                                                                                                                                                                                                                | 1398137 |
| <input type="checkbox"/> | 4   | ▶ 2 and 3                                                                                                                                                                                                                                                                                                                                                                                                                                                                                                                                                                                                                                      | 17323   |
| <input type="checkbox"/> | 5   | ▶ (burnout measure or MBS or BM or Copenhagen Burnout Inventory or CBI or Maslach Burnout Inventory or MBI or Shirom Melamed Burnout Measure or SMBM or Oldenburg Burnout Inventory or OLBI or Utrechts Burn-out Schaal or UBOS or teacher attitude scale or TAS or staff burnout for health professionals or SBS-HP or meier burnout assessment or MBA or emer-luck burnout scale or ELBOS or energy depletion index or EDI or nursing stress scale or TSI or teacher stress inventory or TSI or psychologist's burnout inventory or PBI or medical personnel stress survey or MPSS or burnout clinical subtype questionnaire or BCSQ-36).mp. | 53641   |
| <input type="checkbox"/> | 6   | ▶ 4 and 5                                                                                                                                                                                                                                                                                                                                                                                                                                                                                                                                                                                                                                      | 5450    |
| <input type="checkbox"/> | 7   | ▶ validation.mp.                                                                                                                                                                                                                                                                                                                                                                                                                                                                                                                                                                                                                               | 270251  |
| <input type="checkbox"/> | 8   | ▶ 6 and 7                                                                                                                                                                                                                                                                                                                                                                                                                                                                                                                                                                                                                                      | 149     |
| <input type="checkbox"/> | 9   | ▶ (cohort or longitudinal study or longitudinal studies or longitudinal test* or longitudinal examination* or longitudinal analys* or longitudinal survey*).mp.                                                                                                                                                                                                                                                                                                                                                                                                                                                                                | 755844  |
| <input type="checkbox"/> | 10  | ▶ 4 and 9                                                                                                                                                                                                                                                                                                                                                                                                                                                                                                                                                                                                                                      | 711     |
| <input type="checkbox"/> | 11  | ▶ 6 and 9                                                                                                                                                                                                                                                                                                                                                                                                                                                                                                                                                                                                                                      | 294     |
